# Supplementary material for: Patterns of staging, treatment, and mortality in gastric, colorectal, and lung cancer among older adults with and without preexisting dementia: a Japanese multicentre cohort study
Source: Springer Nature journal article supplement (doi:10.1186/s12885-022-10411-y), 2023-01-19
Supplement: MOESM1 [file 23937070]

Supplementary Table 1. Stage-stratified associations between dementia status and standard cancer treatment in older adults.

|                             | Odds ratio (95% CI)                              | <i>P</i> value | Odds ratio (95% CI)                                          | <i>P</i> value | Odds ratio (95% CI)                                | <i>P</i> value |
|-----------------------------|--------------------------------------------------|----------------|--------------------------------------------------------------|----------------|----------------------------------------------------|----------------|
|                             |                                                  |                | <u>Tumour resection<sup>a</sup> for stage 0 CRC (n=1916)</u> |                |                                                    |                |
| No dementia                 | Reference                                        |                | Reference                                                    |                |                                                    |                |
| Mild dementia               |                                                  |                | 0.99 (0.12–8.07)                                             | 0.994          |                                                    |                |
| Moderate-to-severe dementia |                                                  |                | 0.05 (0.01–0.28)                                             | <0.001         |                                                    |                |
|                             | <u>Tumour resection for stage I GC (n=3756)</u>  |                | <u>Tumour resection for stage I CRC (n=1495)</u>             |                | <u>Tumour resection for stage I NSCLC (n=1424)</u> |                |
| No dementia                 | Reference                                        |                | Reference                                                    |                | Reference                                          |                |
| Mild dementia               | 0.59 (0.34–1.04)                                 | 0.068          | 0.88 (0.40–1.94)                                             | 0.760          | 0.30 (0.17–0.53)                                   | <0.001         |
| Moderate-to-severe dementia | 0.11 (0.05–0.22)                                 | <0.001         | 0.22 (0.06–0.81)                                             | 0.023          | 0.25 (0.05–1.17)                                   | 0.079          |
|                             | <u>Tumour resection for stage II GC (n=573)</u>  |                | <u>Tumour resection for stage II CRC (n=1431)</u>            |                | <u>Tumour resection for stage II NSCLC (n=374)</u> |                |
| No dementia                 | Reference                                        |                | Reference                                                    |                | Reference                                          |                |
| Mild dementia               | 1.15 (0.50–2.67)                                 | 0.738          | 1.25 (0.55–2.84)                                             | 0.594          | 0.31 (0.08–1.23)                                   | 0.096          |
| Moderate-to-severe dementia | 0.20 (0.03–1.25)                                 | 0.085          | 0.65 (0.24–1.77)                                             | 0.401          | 0.00 (0.00–>1000)                                  | >0.99          |
|                             | <u>Tumour resection for stage III GC (n=622)</u> |                | <u>Tumour resection for stage III CRC (n=1430)</u>           |                | <u>Pharmacotherapy for stage III NSCLC (n=717)</u> |                |
| No dementia                 | Reference                                        |                | Reference                                                    |                | Reference                                          |                |
| Mild dementia               | 1.80 (0.80–4.06)                                 | 0.154          | 2.47 (1.32–4.63)                                             | 0.005          | 0.36 (0.08–1.58)                                   | 0.176          |
| Moderate-to-severe dementia | 0.79 (0.19–3.31)                                 | 0.752          | 2.63 (0.79–8.74)                                             | 0.114          | 0.00 (0.00–>1000)                                  | >0.99          |
|                             | <u>Pharmacotherapy for stage IV GC (n=969)</u>   |                | <u>Tumour resection for stage IV CRC (n=924)</u>             |                | <u>Pharmacotherapy for stage IV NSCLC (n=1451)</u> |                |
| No dementia                 | Reference                                        |                | Reference                                                    |                | Reference                                          |                |
| Mild dementia               | 0.50 (0.22–1.13)                                 | 0.095          | 1.54 (0.85–2.77)                                             | 0.153          | 0.38 (0.23–0.64)                                   | <0.001         |
| Moderate-to-severe dementia | 0.41 (0.11–1.49)                                 | 0.175          | 1.35 (0.57–3.20)                                             | 0.500          | 0.25 (0.09–0.66)                                   | 0.005          |

CI, confidence interval; CRC, colorectal cancer; GC, gastric cancer; NSCLC, non-small cell lung cancer. All odds ratios are adjusted for age, sex, and comorbidities.

<sup>a</sup>Tumour resection includes endoscopic resection, open surgical resection, laparoscopic resection, and thoracoscopic resection.
